# Supplementary material for: Development and validation of a dynamic nomogram for individualized prediction of survival in patients with colon cancer
Source: Research Square preprint supplement (doi:10.21203/rs.3.rs-4181641/v1), 2024-04-12
Supplement: Supplementary file 1 [file d7e505f0e6eff4a17786b56e.docx]

# Supplementary materials

|  | Impaired nutritional status | Severity of disease |
| --- | --- | --- |
| Absent  Score 0 | Normal nutritional status | Normal nutritional requirements |
| Mild  Score 1 | Weight loss > 5% in 3 months  Or  Food intake below 50-75% of normal requirement in preceding week | Hip fracture  Chronic patients, in particular with acute complications: cirrhosis, COPD  Chronic hemodialysis, diabetes, oncology |
| Moderate  Score 2 | Weight loss > 5% in 2 months  Or  Impaired general condition with BMI 18.5-20.5  Or  Food intake 25-50% of normal requirement in preceding week | Major abdominal surgery  Stroke  Severe pneumonia, hematologic malignancy |
| Severe  Score 3 | Weight loss > 5% in 1 month (≈ > 15% in 3 months)  Or  Impaired general condition with BMI < 18.5  Or  Food intake 0-25% of normal requirement in preceding week | Head injury  Bone marrow transplantation  Intensive care patients |
| Total score | 1. Find score (0-3) for Impaired nutritional status and Severity of disease 2. Add the two scores (total score) 3. If age ≥ 70 years: add 1 to the total score to correct for frailty of elderly | |

**Table 1.** Nutrition risk screening 2002. *BMI* body mass index; *COPD* chronic obstructive pulmonary disease.


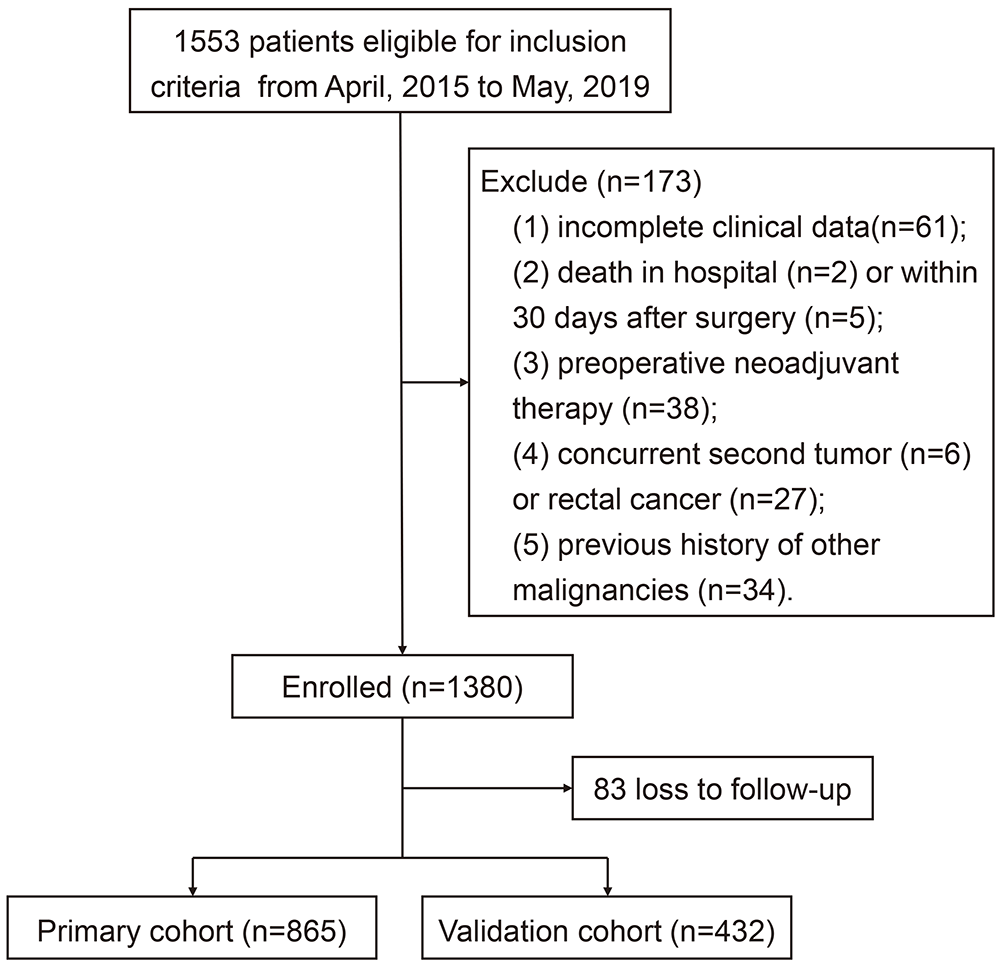


**Figure 1**. Flow chart of enrolled patients.


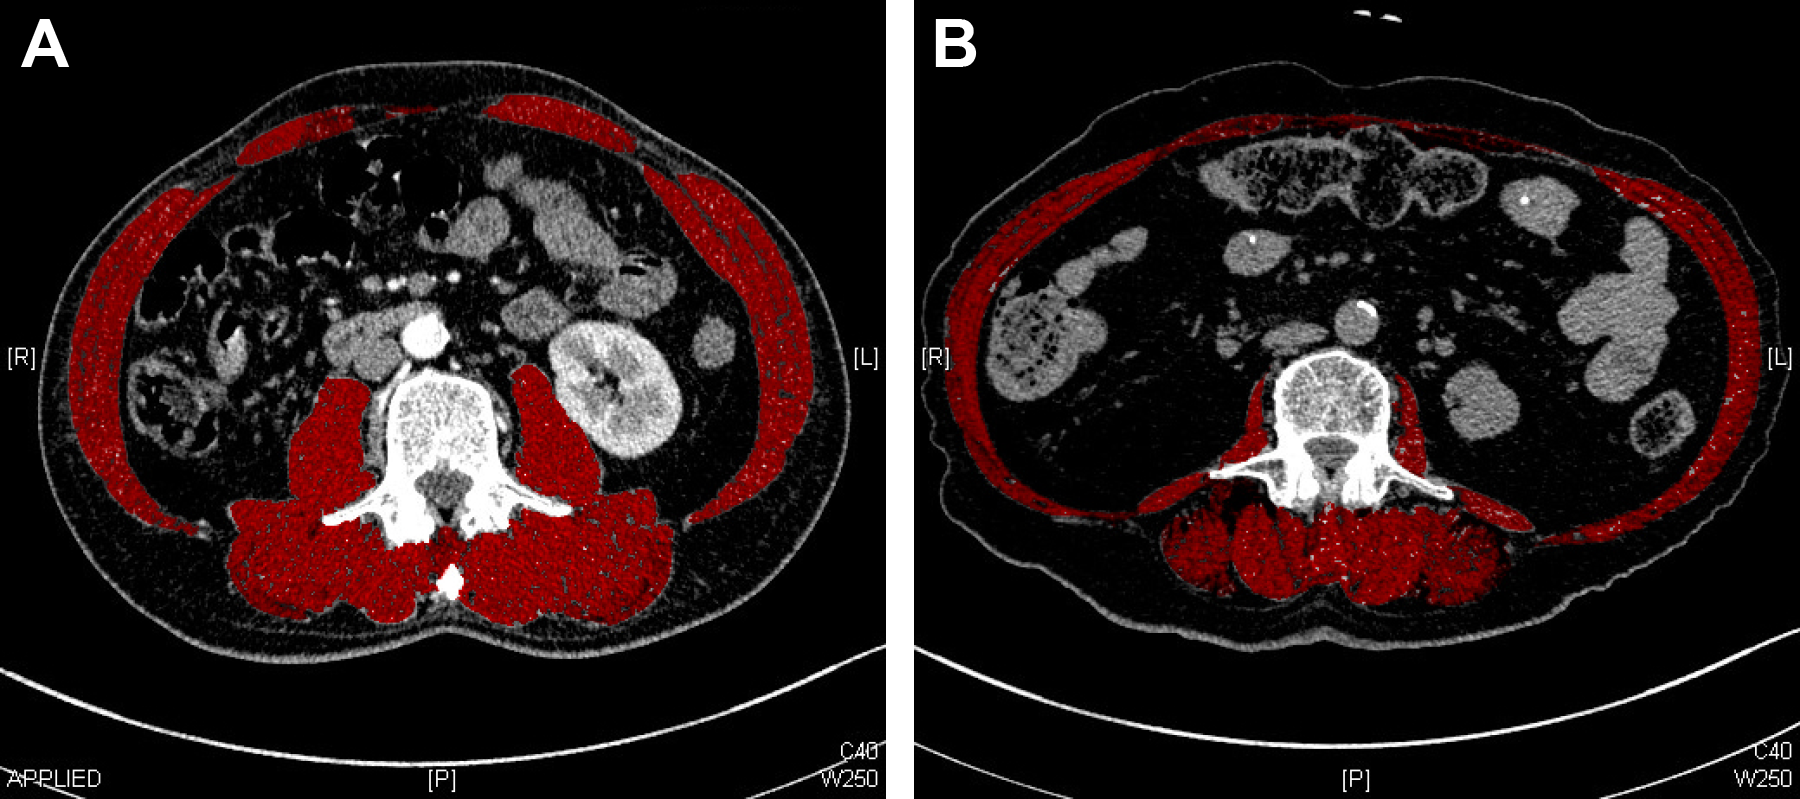


**Figure 2**. Example of segmentation of skeletal muscle tissue at the third lumbar vertebrae level. The skeletal muscle area was measured by manual tracing in male (A) and female (B).
